# Supplementary material for: Evolution, Expression, and Function of Nonneuronal Ligand-Gated Chloride Channels inDrosophila melanogaster
Source: Oxford University Press journal article supplement (doi:10.1534/g3.116.029546), 2016-07-01
Supplement: 029546_figures1.pdf [file 029546_figures1.pdf]

Figure S1

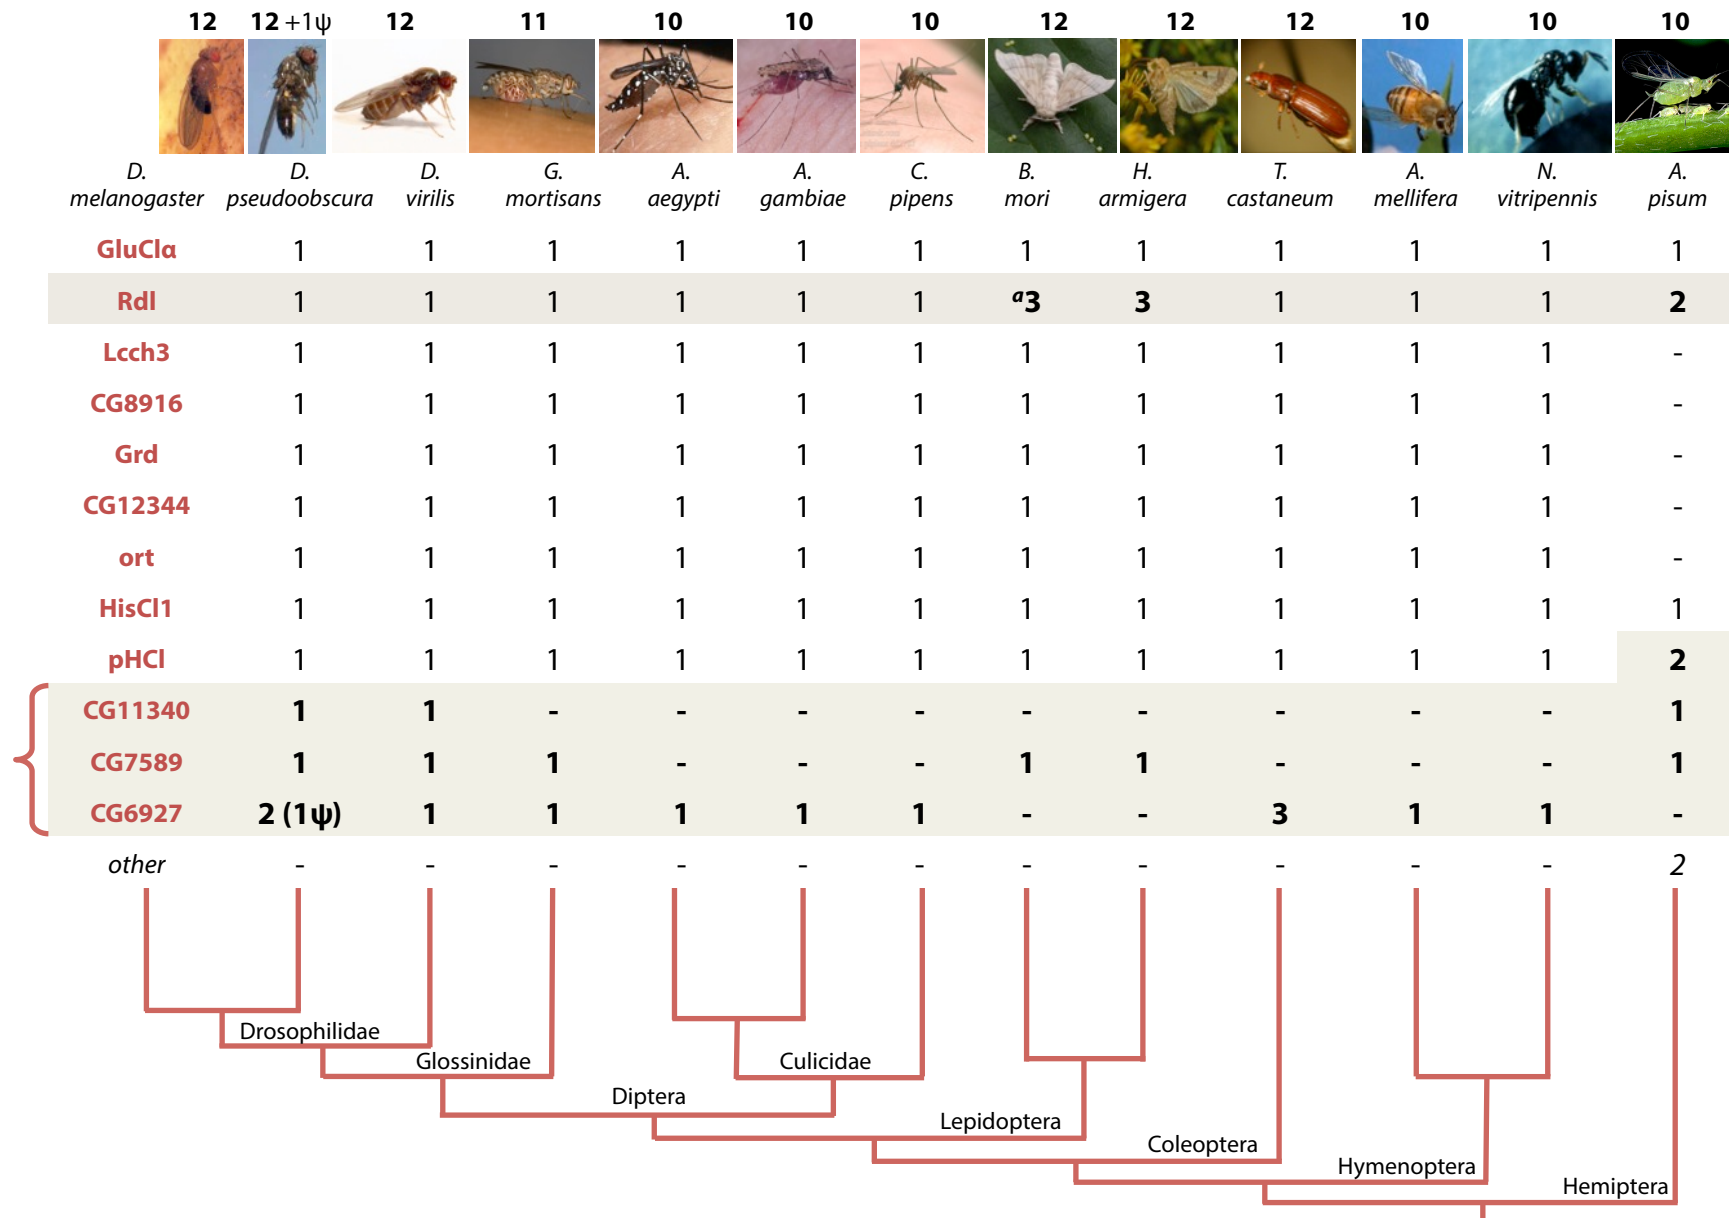

**Figure S1.** LGCC gene copy number present in the genome sequences of insect species. Total number of subunits in each species is indicated at the top of the figure. Orthologues are compared to the *D. melanogaster* reference gene set. Copy number was determined by BLAST searches.
