# Supplementary material for: Evolution, Expression, and Function of Nonneuronal Ligand-Gated Chloride Channels inDrosophila melanogaster
Source: Oxford University Press journal article supplement (doi:10.1534/g3.116.029546), 2016-07-01
Supplement: 029546_figures2.pdf [file 029546_figures2.pdf]

Figure S2 a

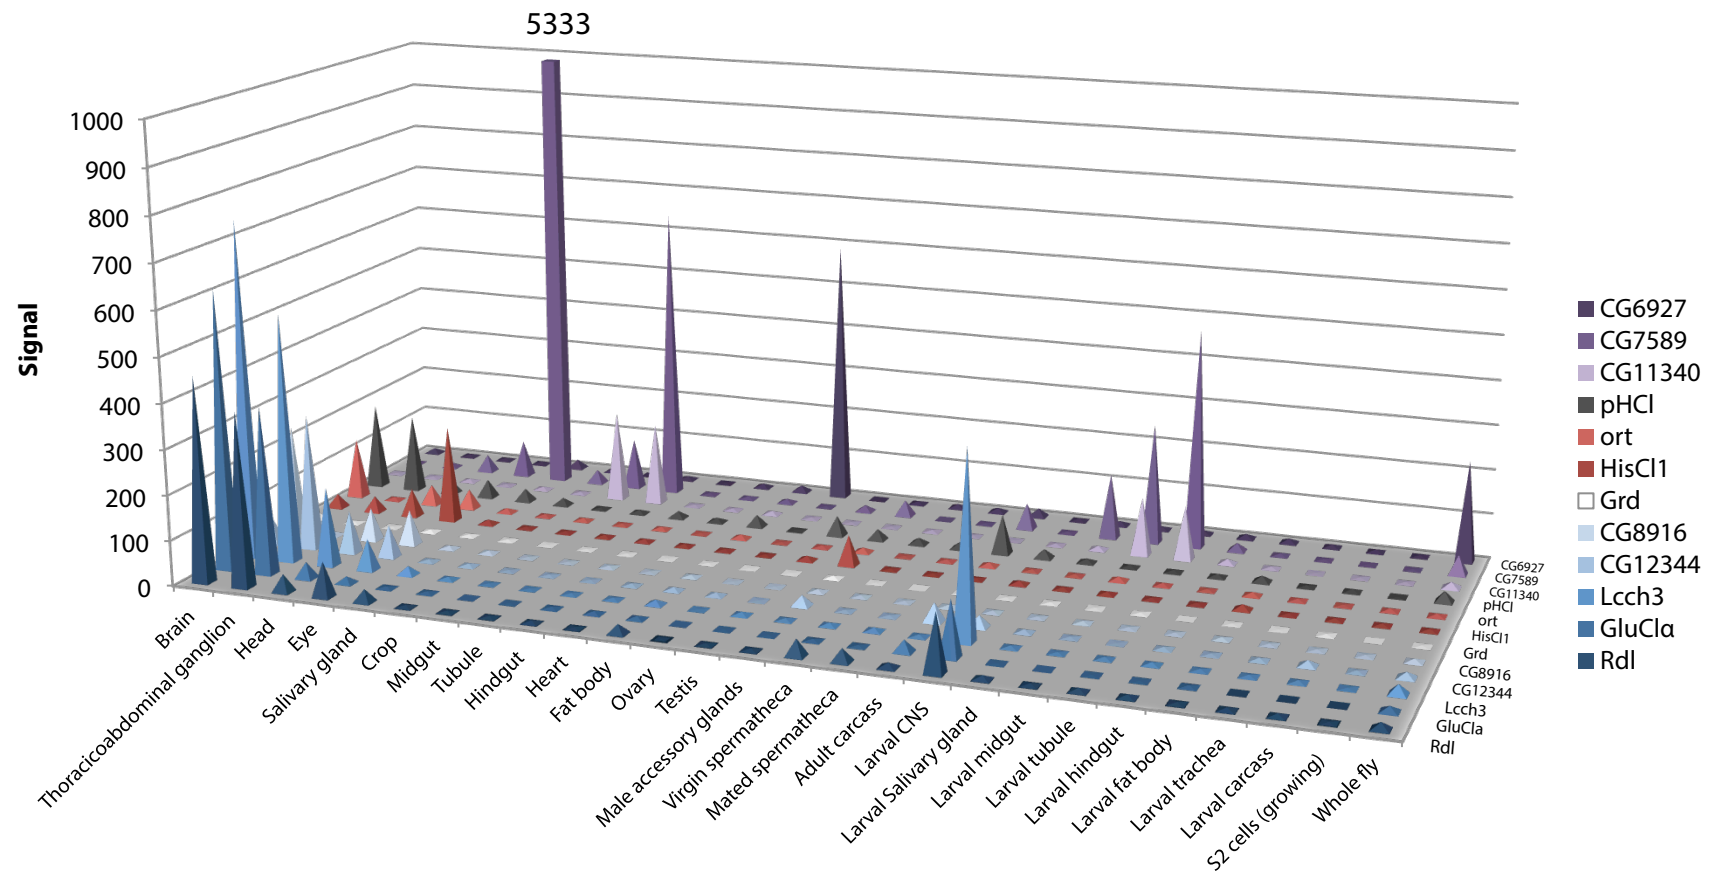

Figure S2 a. FlyAtlas spatial expression information for the 12 *Drosophila melanogaster* LGCC subunits.

Figure S2 b

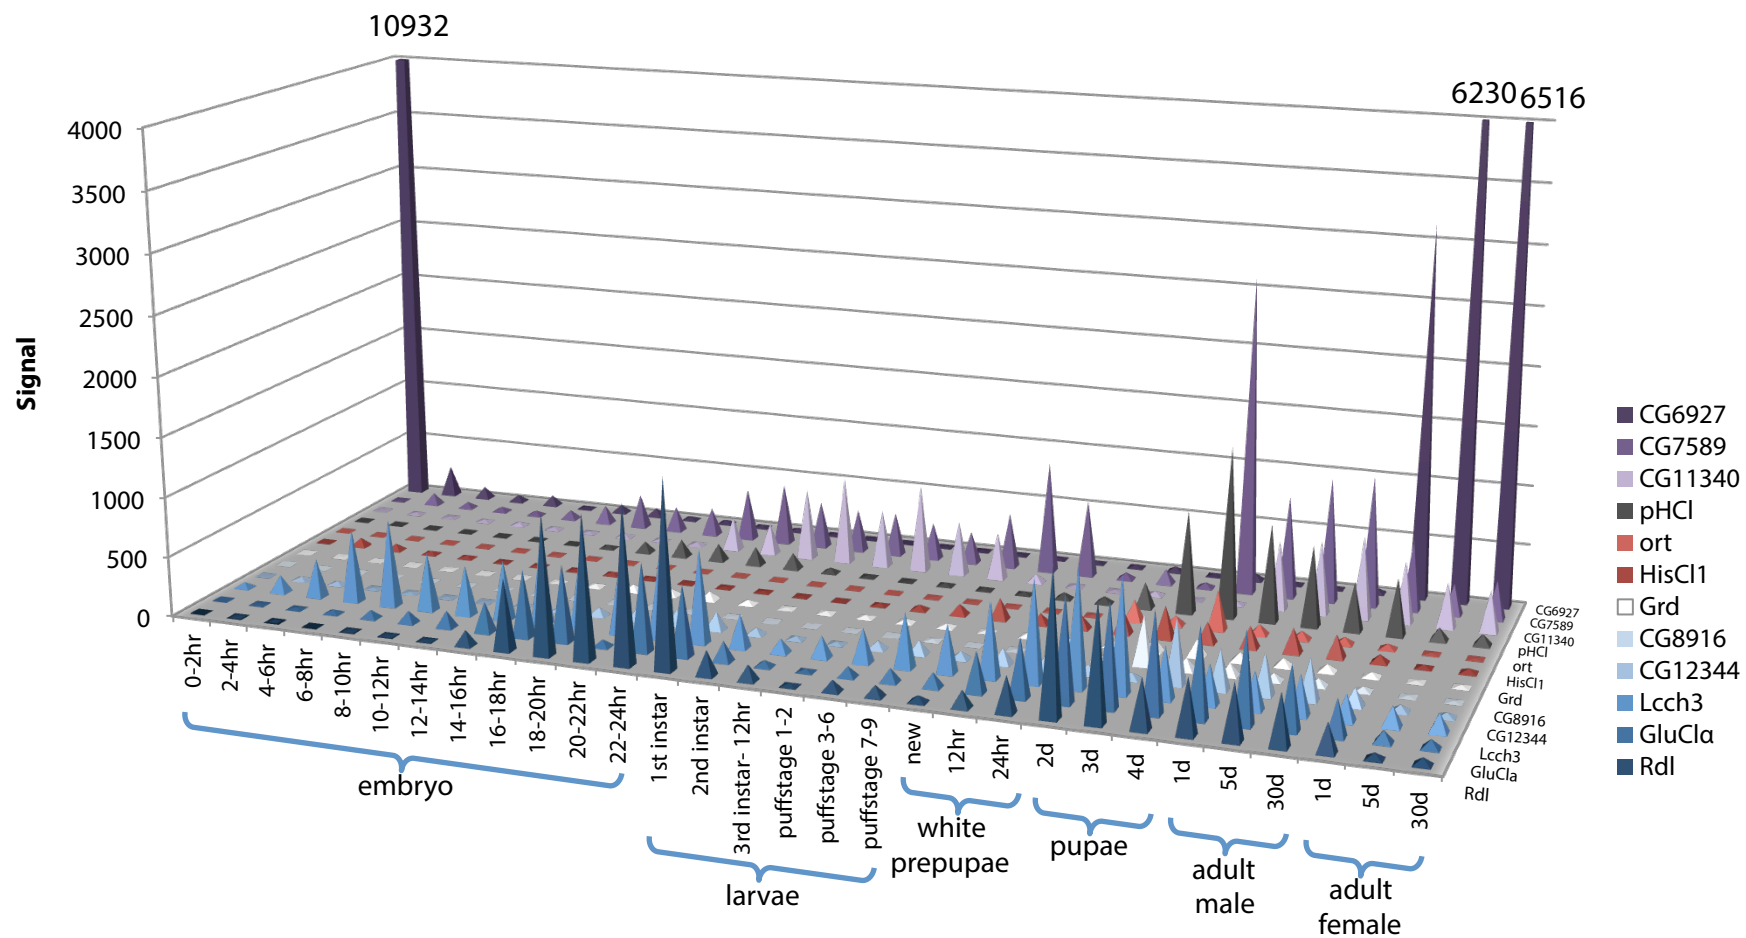

Figure S2 b ModEncode temporal expression information for the 12 *Drosophila melanogaster* LGCC subunits.
