# Supplementary material for: Evolution, Expression, and Function of Nonneuronal Ligand-Gated Chloride Channels inDrosophila melanogaster
Source: Oxford University Press journal article supplement (doi:10.1534/g3.116.029546), 2016-07-01
Supplement: 029546_figures3.pdf [file 029546_figures3.pdf]

Figure S3

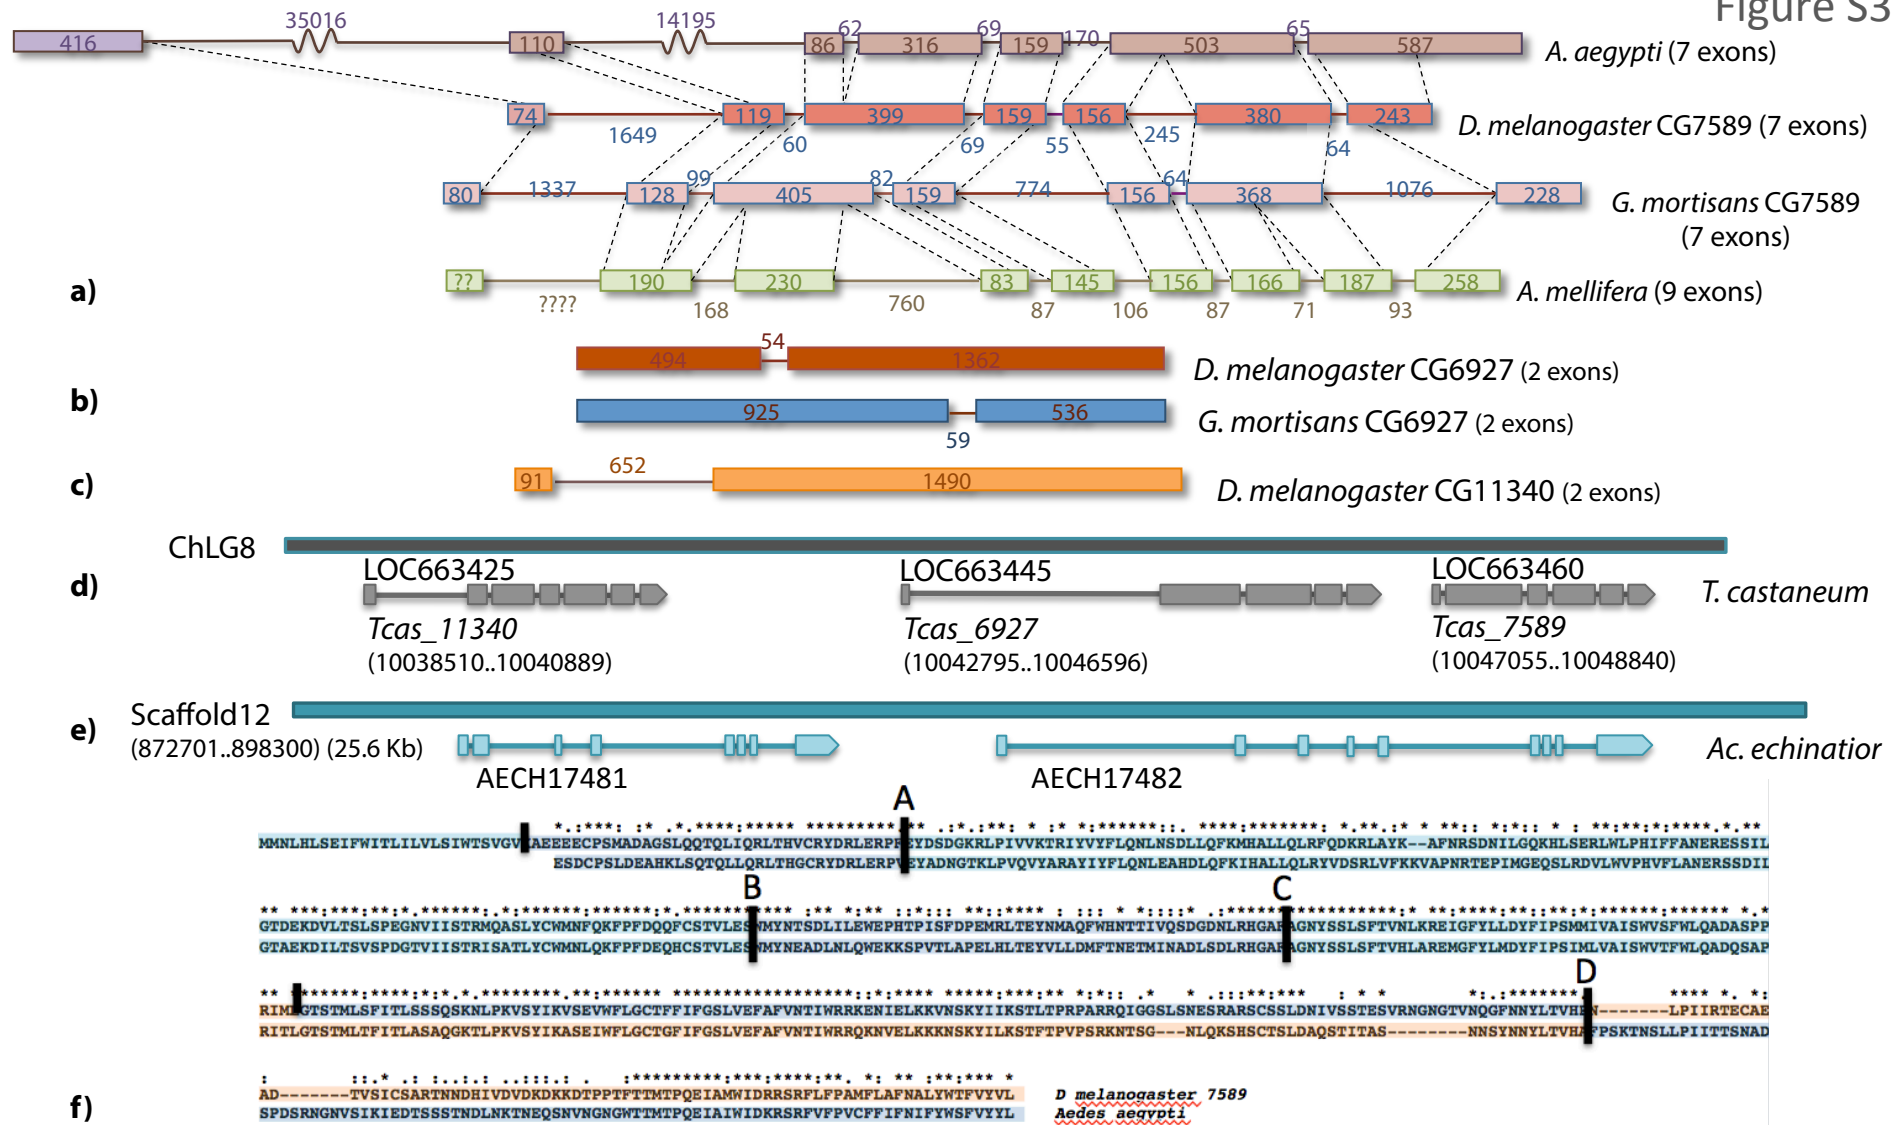

**Figure S3.** Genomic organisation of Insect group I subunits. **a)** Exon structure of CG7589 in *Aedes aegypti*, *Drosophila melanogaster*, *Glossinia morisans* and *Apis mellifera*, showing corresponding intron-exon boundaries. **b)** CG6927 in *D. melanogaster* and *G. mortisans* contain a single intron at different sites in the coding region. **c)** CG11340 from *D. melanogaster* contains a single intron early in the coding region. **d)** The *Tribolium castaneum* trio are tandemly arranged on the same linkage group and contain a similar number of exons. **e)** The *Acromyrmex echinator* duo are tandemly arranged with a similar number of exons. **f)** Detailed comparison of CG7589 amino acid alignment of *D. melanogaster* and *Aedes aegypti*, with position of introns in common indicated by A-D
