# Supplementary material for: Evolution, Expression, and Function of Nonneuronal Ligand-Gated Chloride Channels inDrosophila melanogaster
Source: Oxford University Press journal article supplement (doi:10.1534/g3.116.029546), 2016-07-01
Supplement: 029546_figures4.pdf [file 029546_figures4.pdf]

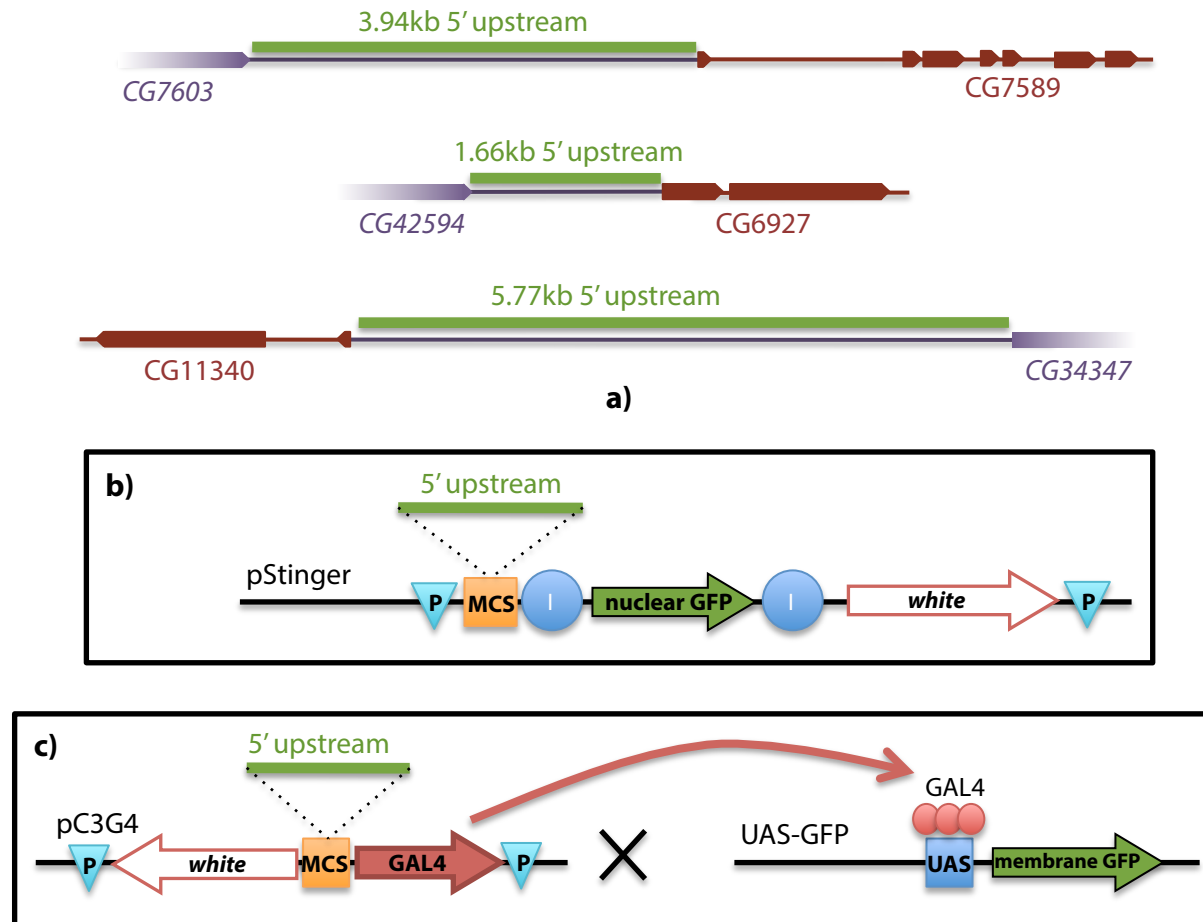

**Figure S4.** Construction of 5' upstream promoter constructs. **a)** 5' upstream sequence of CG7589 (3.94kb), CG6927 (1.66kb) and CG11340 (5.04kb). **b)** The pStinger vector (Barolo *et al.*, 2000), showing position of nuclear GFP downstream from the multi-cloning site (MCS), where the 5' upstream regions are inserted. **c)** pC3G4 vector (derived from Thummel and Pirotta, 1991, and Brand and Perrimon, 1993) allows the direct insertion of identified promoter fragments in front of a Gal4 sequence. This line can be crossed to a UAS-containing line, such as UAS-mGFP, and the GAL4 drive expression of GFP by binding to the UAS sequence.
