# Supplementary material for: Evolution, Expression, and Function of Nonneuronal Ligand-Gated Chloride Channels inDrosophila melanogaster
Source: Oxford University Press journal article supplement (doi:10.1534/g3.116.029546), 2016-07-01
Supplement: 029546_figures5.pdf [file 029546_figures5.pdf]

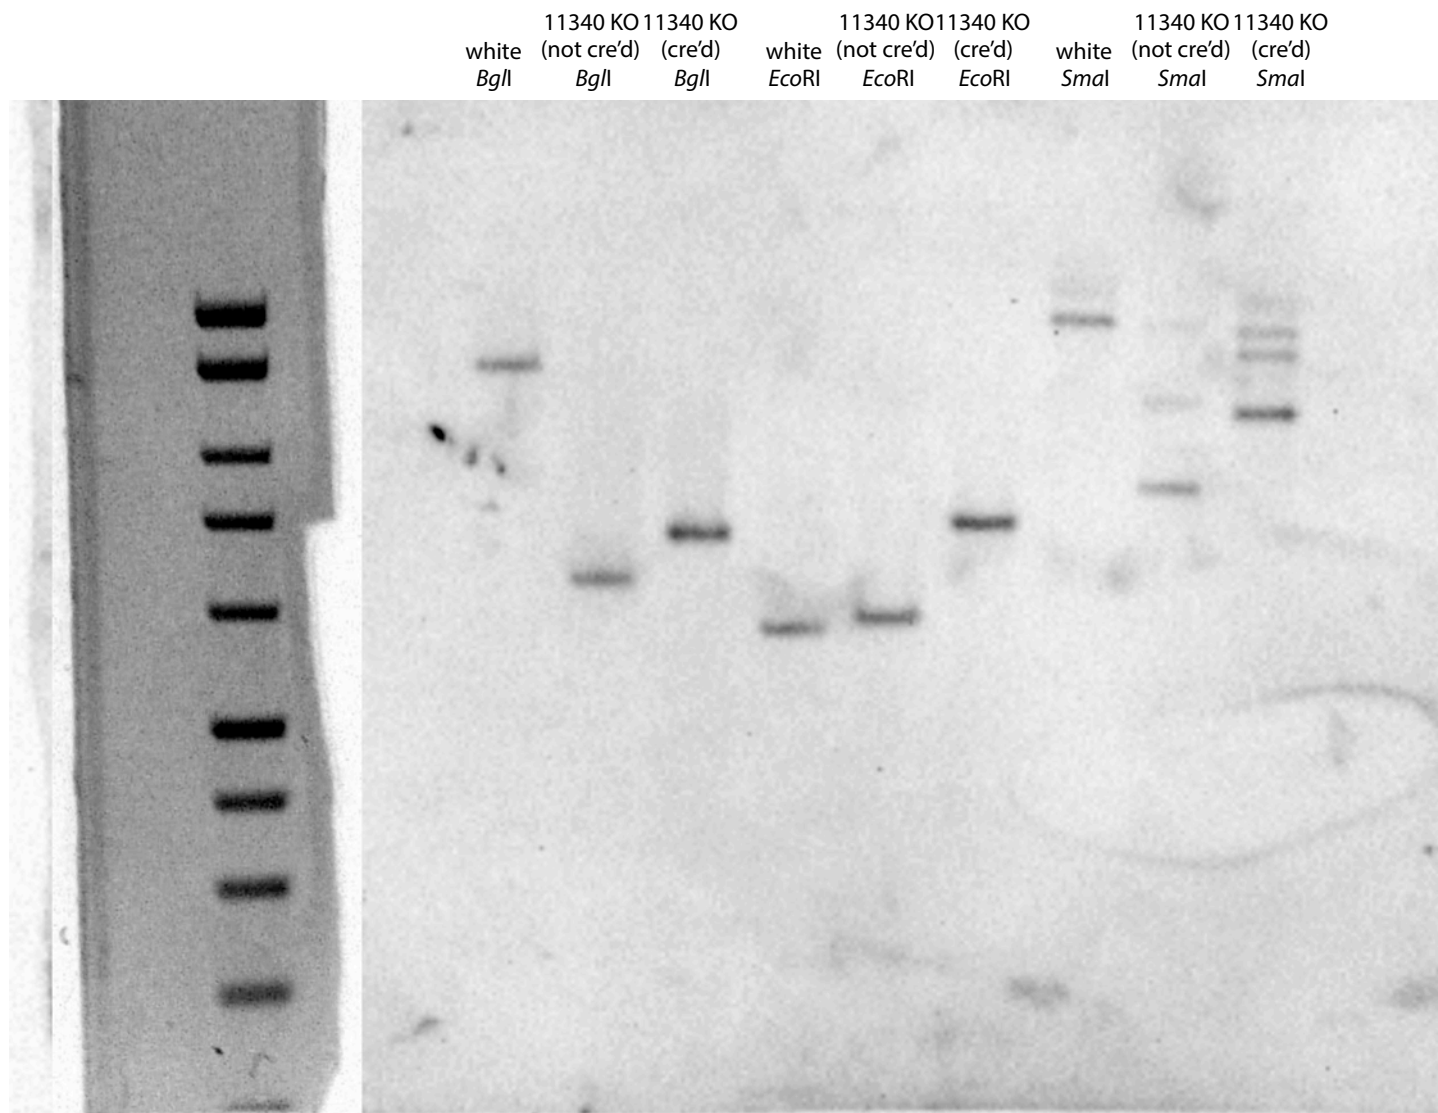

**Figure S5.** Southern Blot of parental (white) and CG11340 knockout (line 4A2) using a 3kb homology arm probe. Image is of a 5 minute exposure. 1kb ladder (lane 1 - Bioline). Genomic DNA from parental, 11340 KO and 11340 cre-lox KO blotted using DNA digested with *Bgl* (lanes 2-4), *EcoRV* (lanes 5-7) and *SmaI* (lanes 8-10). Note: sequencing across the deletion and probe region revealed an additional *EcoRV* site present in the parental strain that led to the smaller than expected size of the knockout and this enzyme was not used to verify other deletion lines.
