# Supplementary material for: Evolution, Expression, and Function of Nonneuronal Ligand-Gated Chloride Channels inDrosophila melanogaster
Source: Oxford University Press journal article supplement (doi:10.1534/g3.116.029546), 2016-07-01
Supplement: 029546_figures6.pdf [file 029546_figures6.pdf]

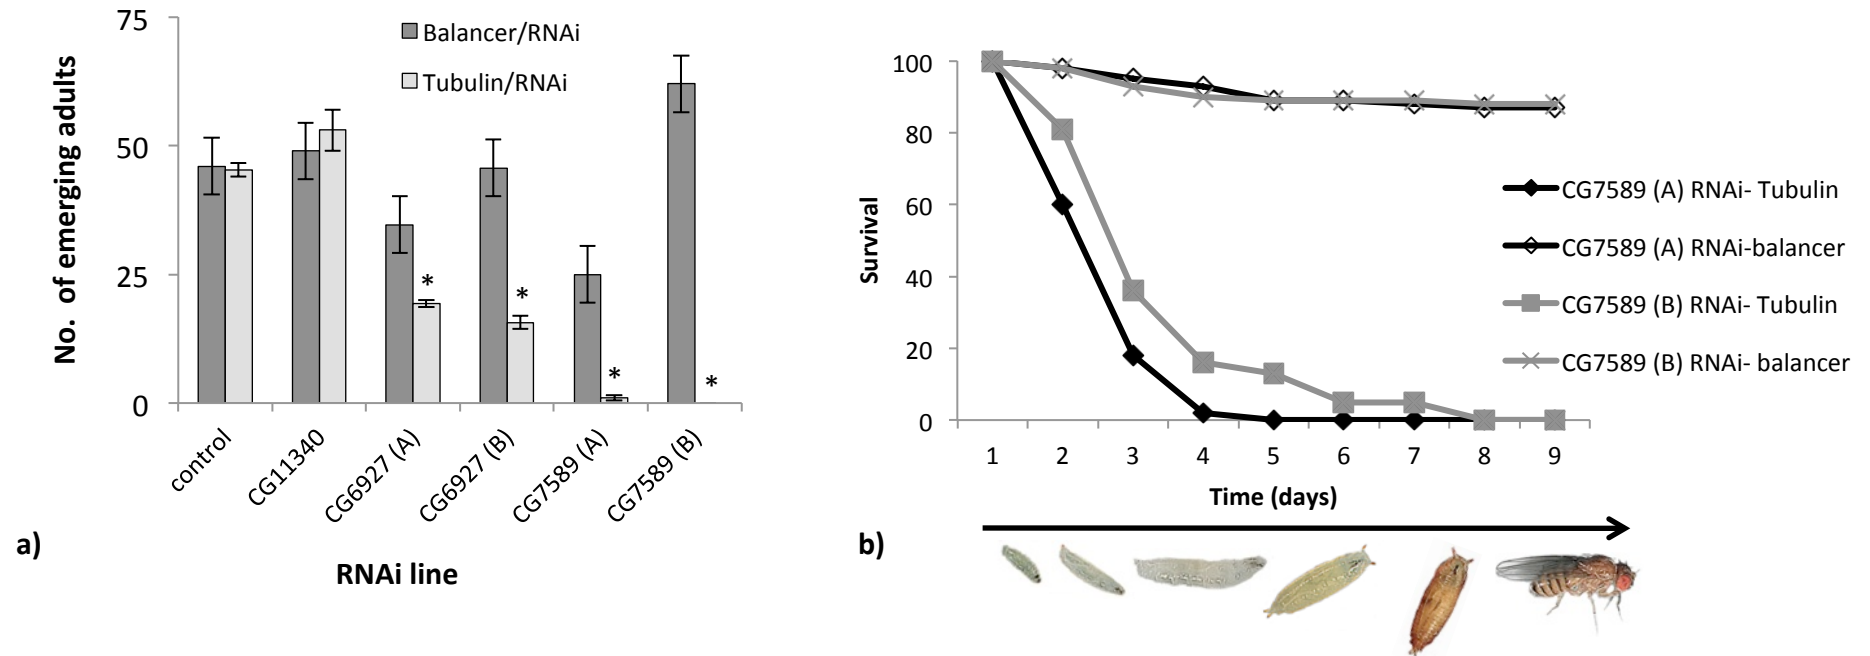

**Figure S6. a)** Tubulin-GAL4 driver over TM3 balancer crossed to RNAi hairpin lines for CG11340, CG6927 and CG7589 (TRiP (A); and KK (B)), and non-hairpin control. Number of balancer to non-balancer emerging adults were compared to determine if RNAi-mediated knockdown results in reduced viability. CG11340 tubulin-RNAi showed equivalent viability compared to balancers, while both CG6927 showed reduced viability. **b)** *Tubulin* RNAi of CG7589 examined over 9 days during development to determine lethal time point. Y axis indicates percent survival. CG7589 RNAi offspring survival compared compared to GFP balancer controls.
